# Supplementary material for: Butyric acid, a gut bacteria metabolite, lowers arterial blood pressure via colon-vagus nerve signaling and GPR41/43 receptors
Source: PubMed Central journal article supplement (PMC6882756; doi:10.1007/s00424-019-02322-y), 2019-11-15
Supplement: 424_2019_2322_MOESM1_ESM.pdf [file 424_2019_2322_MOESM1_ESM.pdf]

# Supplementary Materials

**Title:**

Butyric acid, a gut bacteria metabolite, lowers arterial blood pressure via colon-vagus nerve signalling and GPR41/43 receptors.

# INTRAVENOUS ADMINISTRATION

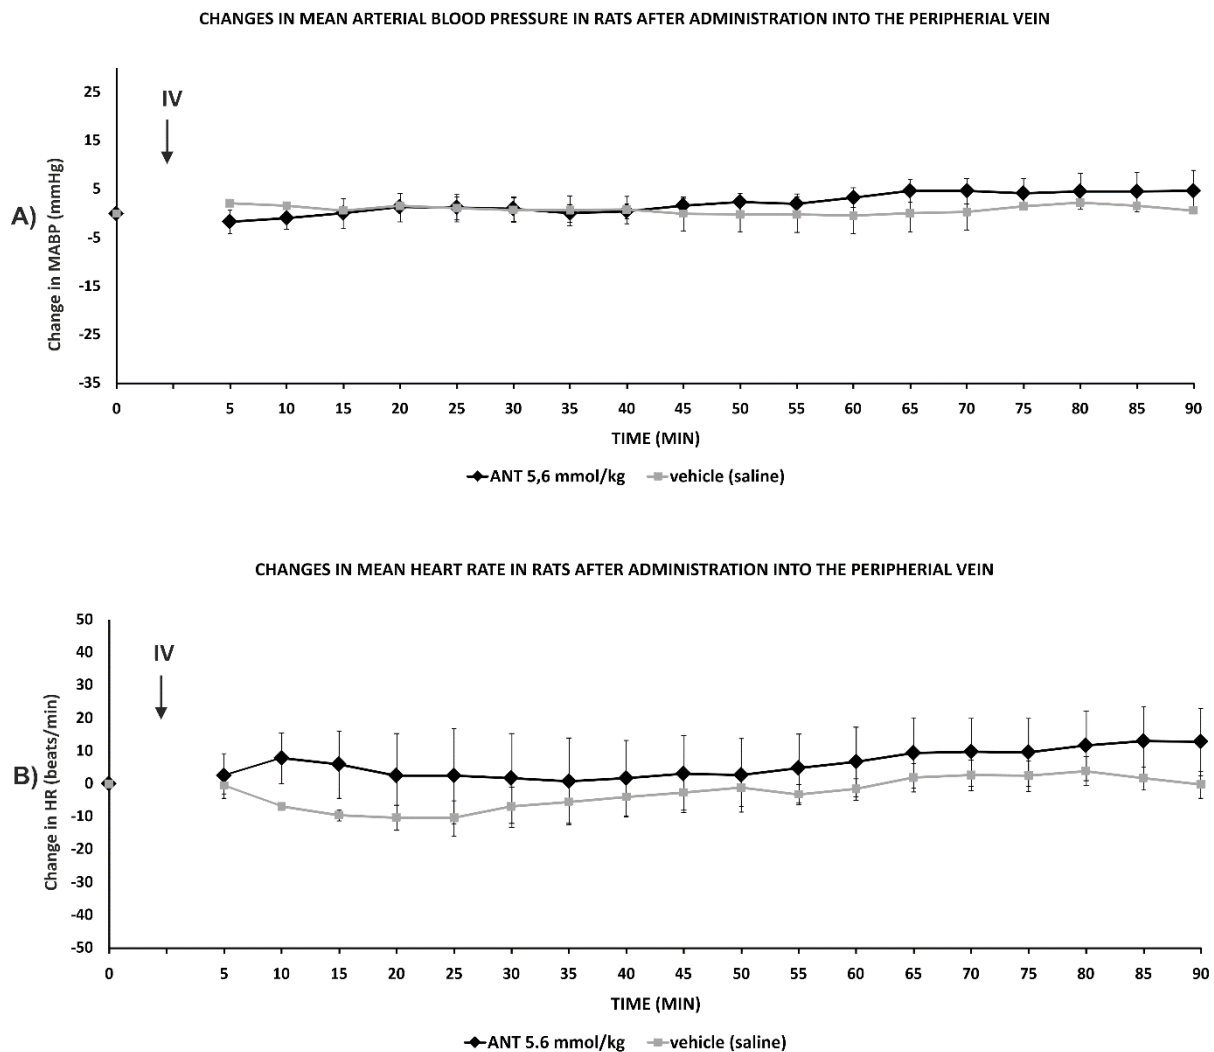

**Figure S1.**

[A] Changes in mean arterial blood pressure ( $\Delta$ MABP, mmHg) and [B] heart rate ( $\Delta$ HR, beats/min) in Wistar rats after the intravenous administration (IV) of either a vehicle (saline 0.2 ml/2min) or ANT at a dose of 5.6 mmol/kg. Means  $\pm$  SE are presented.

\* - vs Baseline

CHANGES IN MEAN ARTERIAL BLOOD PRESSURE IN RATS AFTER ADMINISTRATION INTO THE PERIPHERAL VEIN

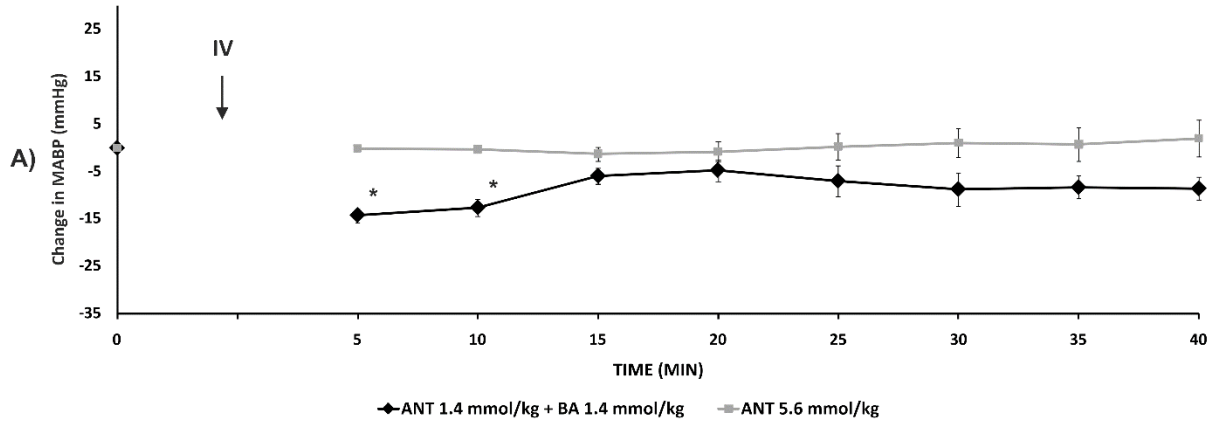

CHANGES IN MEAN HEART RATE IN RATS AFTER ADMINISTRATION INTO THE PERIPHERAL VEIN

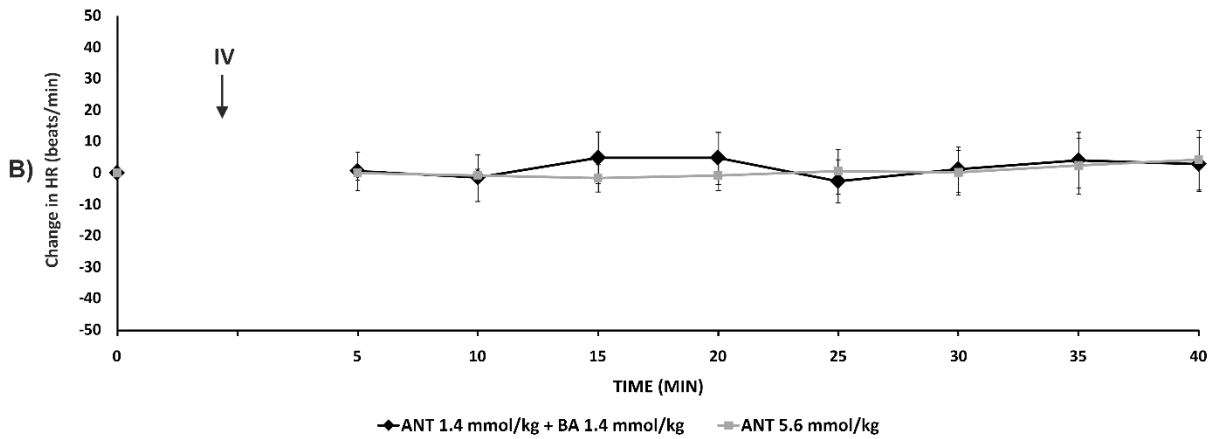

**Figure S2.**

[A] Changes in mean arterial blood pressure ( $\Delta$ MABP, mmHg) and [B] heart rate ( $\Delta$ HR, beats/min) in Wistar rats after the intravenous administration (IV) of BA at a dose of 1.4 mmol/kg after the pretreatment with the ANT at a dose of 1.4 mmol/kg b.w. Means  $\pm$  SE are presented.

\* - vs Baseline

CHANGES IN MEAN ARTERIAL BLOOD PRESSURE IN RATS AFTER ADMINISTRATION INTO THE PERIPHERAL VEIN

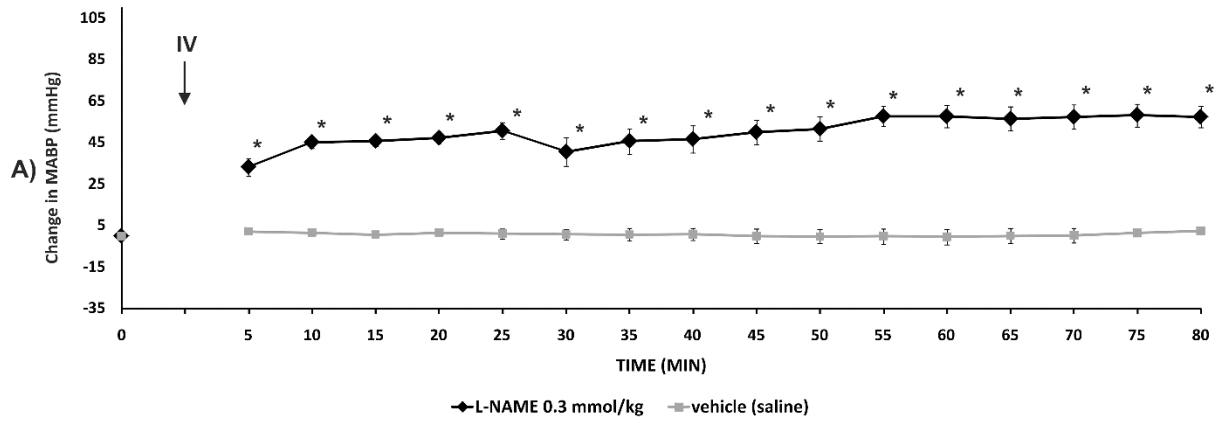

CHANGES IN MEAN HEART RATE IN RATS AFTER ADMINISTRATION INTO THE PERIPHERAL VEIN

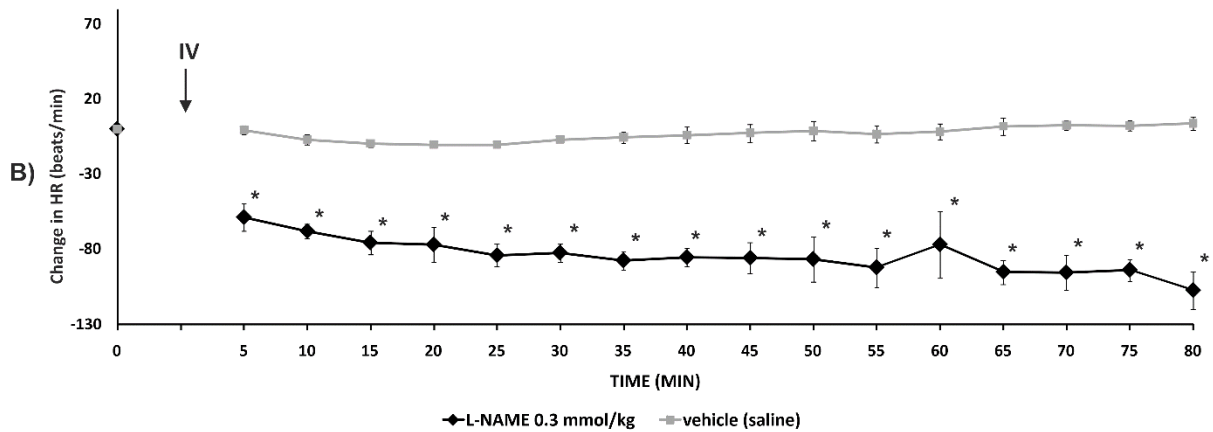

**Figure S3.**

[A] Changes in mean arterial blood pressure ( $\Delta$ MABP, mmHg) and [B] heart rate ( $\Delta$ HR, beats/min) in Wistar rats after the intravenous administration (IV) of L-NAME at a dose of 0.3 mmol/kg b.w. Means  $\pm$  SE are presented.

\* - vs Baseline

CHANGES IN MEAN ARTERIAL BLOOD PRESSURE IN RATS AFTER ADMINISTRATION INTO THE PERIPHERAL VEIN

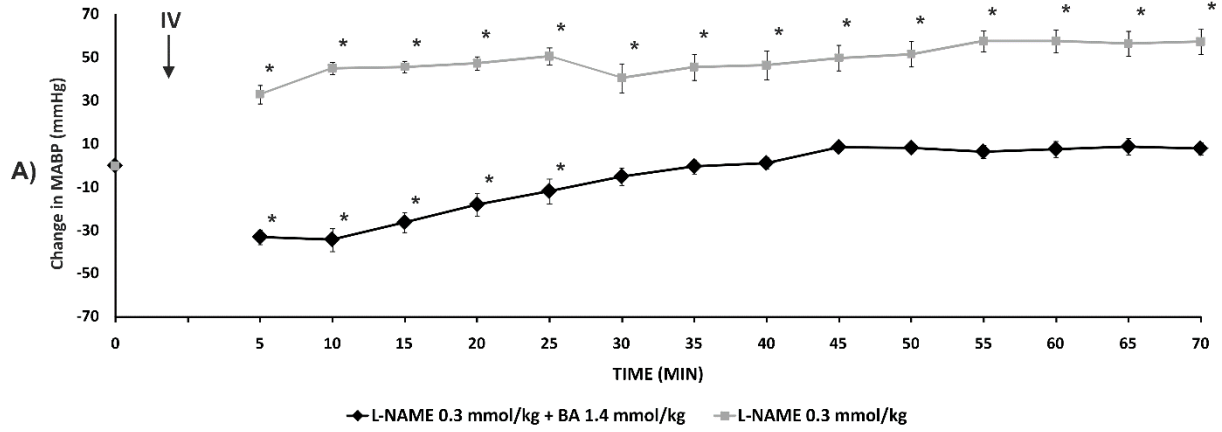

CHANGES IN MEAN HEART RATE IN RATS AFTER ADMINISTRATION INTO THE PERIPHERAL VEIN

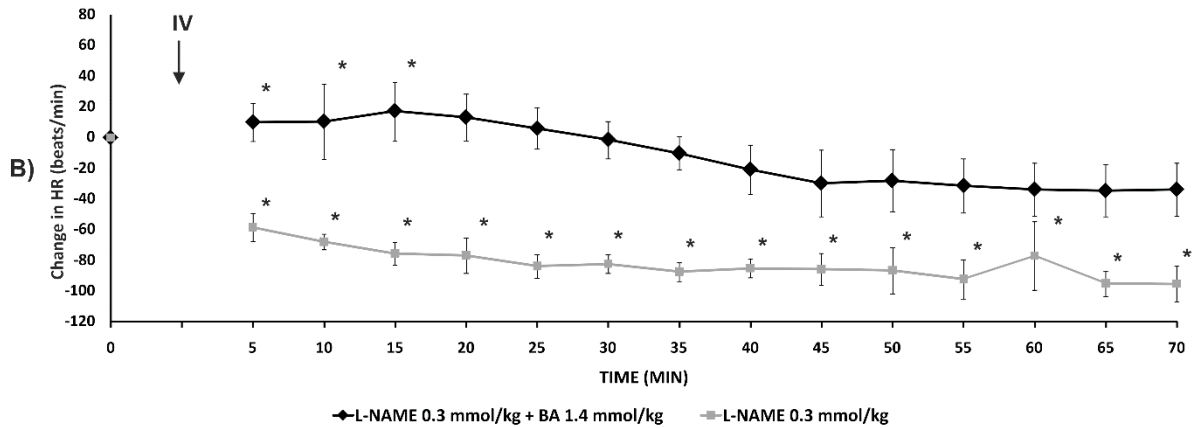

**Figure S4.**

**[A]** Changes in mean arterial blood pressure ( $\Delta$ MABP, mmHg) and **[B]** heart rate ( $\Delta$ HR, beats/min) in Wistar rats after the intravenous administration (IV) of BA at a dose of 1.4 mmol/kg after the pretreatment with L-NAME at a dose of 0.3 mmol/kg b.w. Means  $\pm$  SE are presented.

\* - vs Baseline

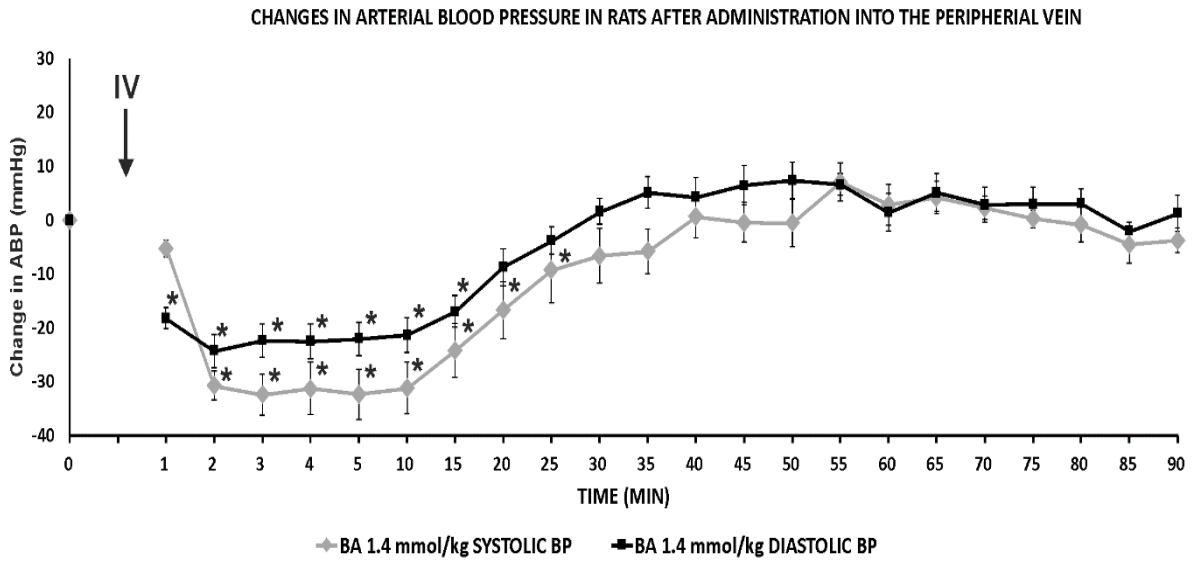

**Figure S5.**

Changes in arterial blood pressure ( $\Delta$ ABP, mmHg) in Wistar rats after the intravenous administration (IV) of BA at a dose of 1.4 mmol/kg. Means  $\pm$  SE are presented.

\* - vs Baseline

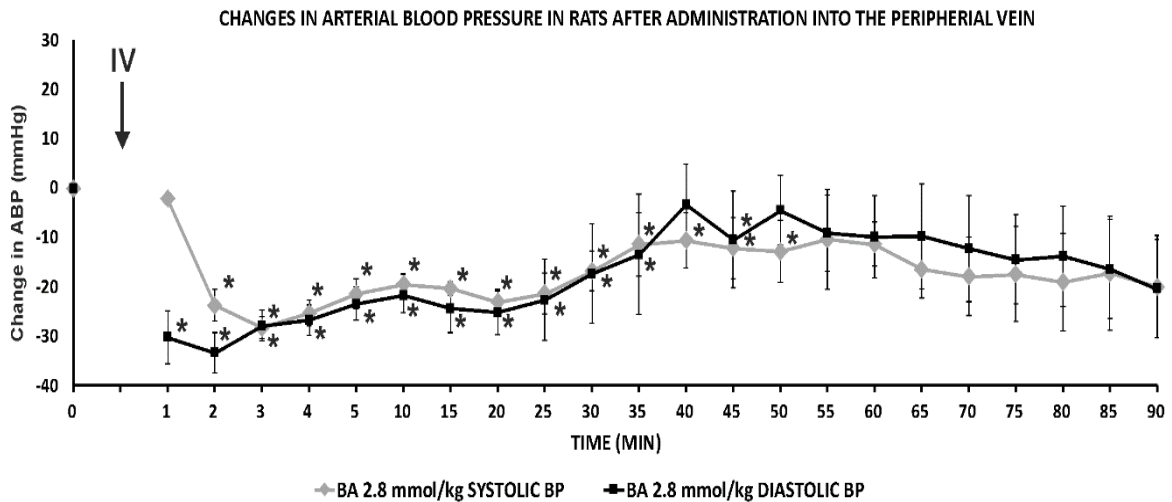

**Figure S6.**

Changes in arterial blood pressure ( $\Delta$ ABP, mmHg) in Wistar rats after the intravenous administration (IV) of BA at a dose of 2.8 mmol/kg. Means  $\pm$  SE are presented.

\* - vs Baseline

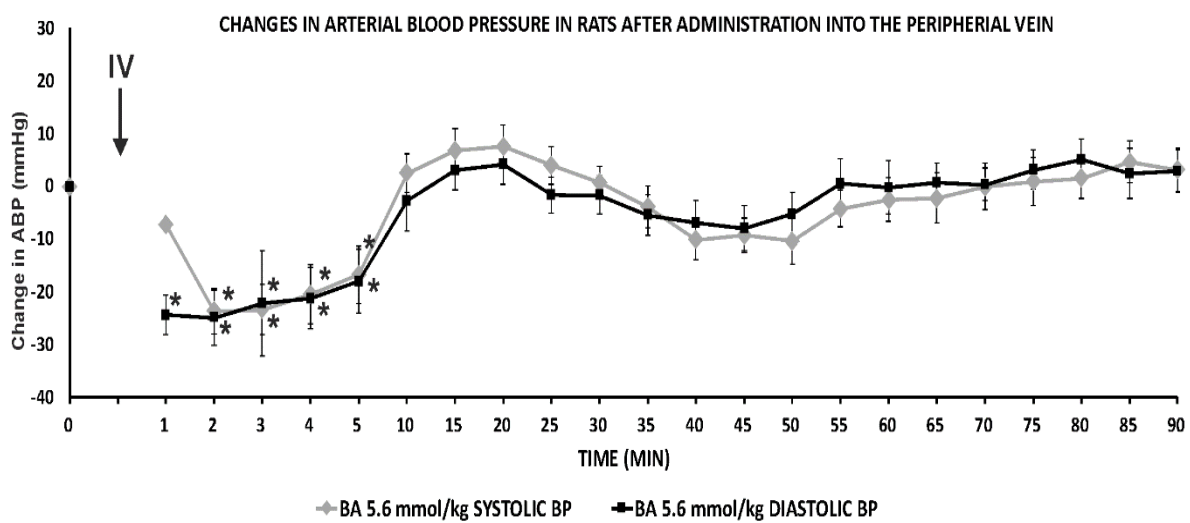

**Figure S7.**

Changes in arterial blood pressure ( $\Delta$ ABP, mmHg) in Wistar rats after the intravenous administration (IV) of BA at a dose of 5.6 mmol/kg. Means  $\pm$  SE are presented.

\* - vs Baseline

# ADMINISTRATION INTO THE COLON

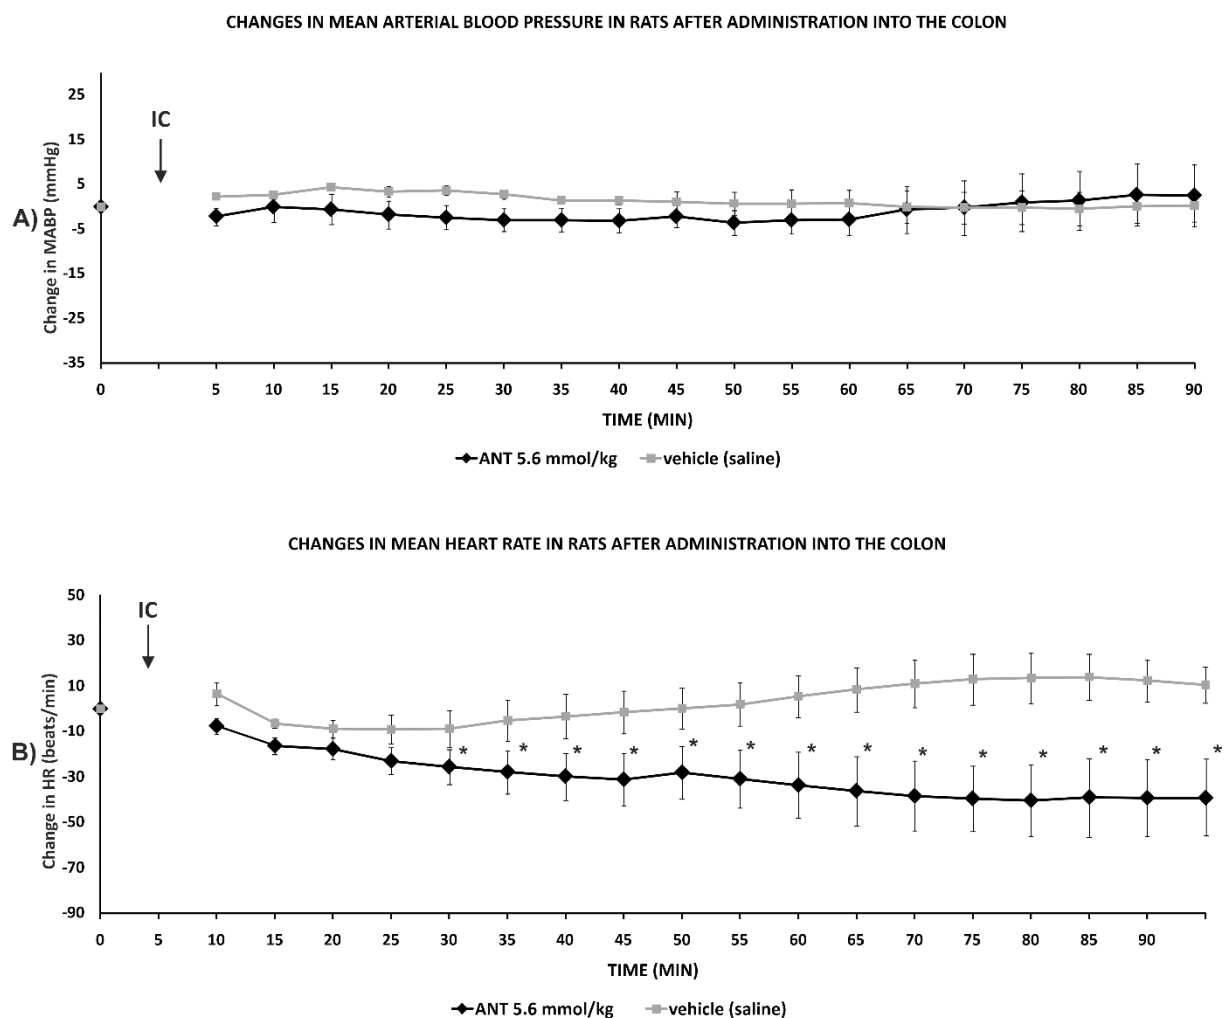

**Figure S8.**

[A] Changes in mean arterial blood pressure ( $\Delta$ MABP, mmHg) and [B] heart rate ( $\Delta$ HR, beats/min) in Wistar rats after administration into the colon (IC) of either a vehicle (saline, 0.25 ml/30s) or ANT at a dose of 5.6 mmol/kg b.w. Means  $\pm$  SE are presented.



\* - vs Baseline

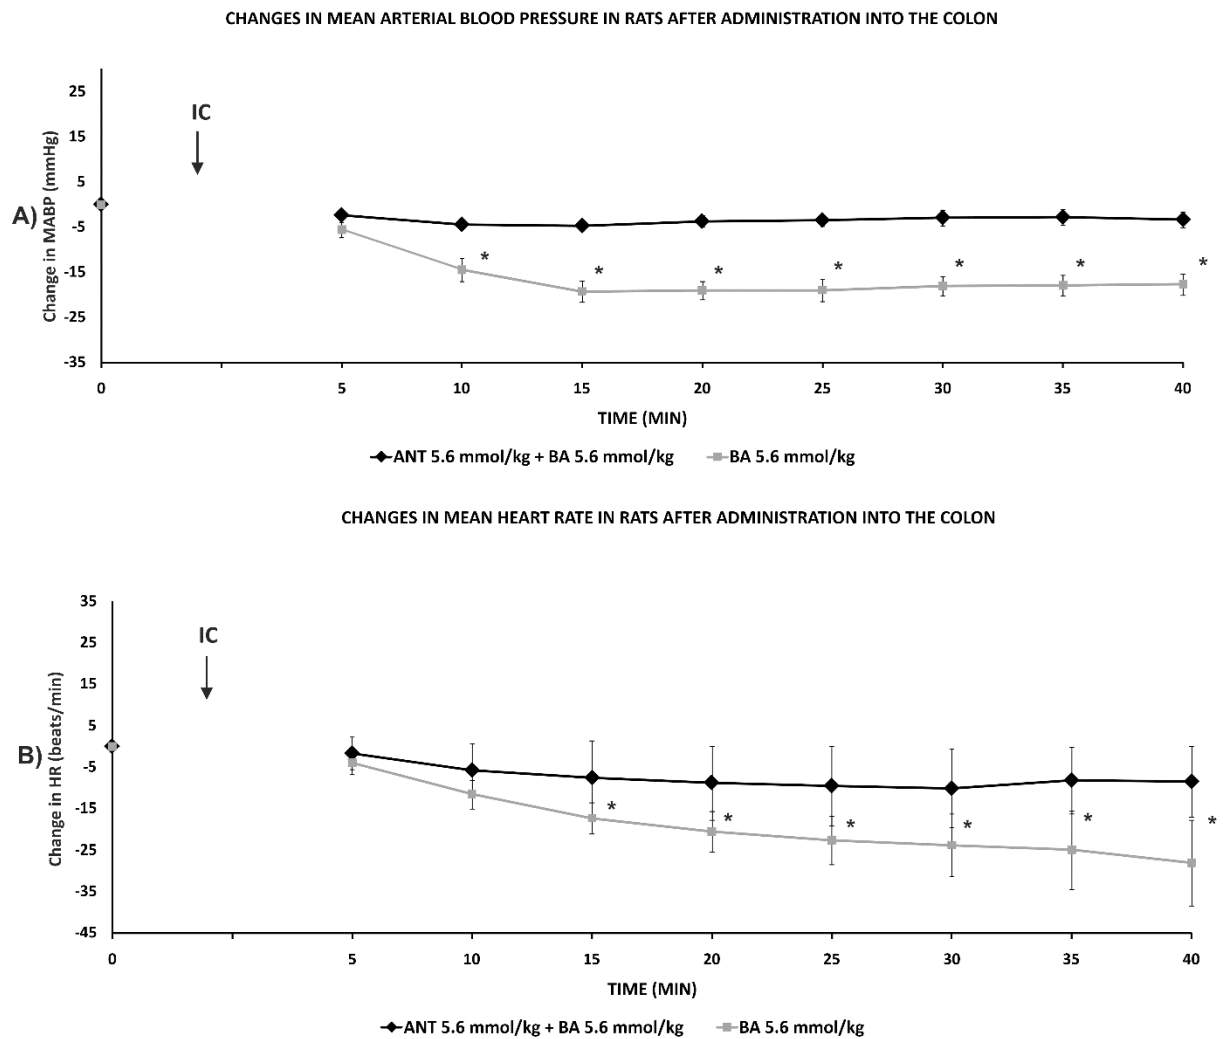

**Figure S9.**

[A] Changes in mean arterial blood pressure ( $\Delta$ MABP, mmHg) and [B] heart rate ( $\Delta$ HR, beats/min) in Wistar rats after administration into the colon (IC) of BA at a dose of 5.6 mmol/kg b.w. after the pretreatment with the ANT at the dose of 5.6 mol/kg b.w. Means  $\pm$  SE are presented.

\* - vs Baseline

CHANGES IN MEAN ARTERIAL BLOOD PRESSURE IN RATS AFTER ADMINISTRATION INTO THE COLON

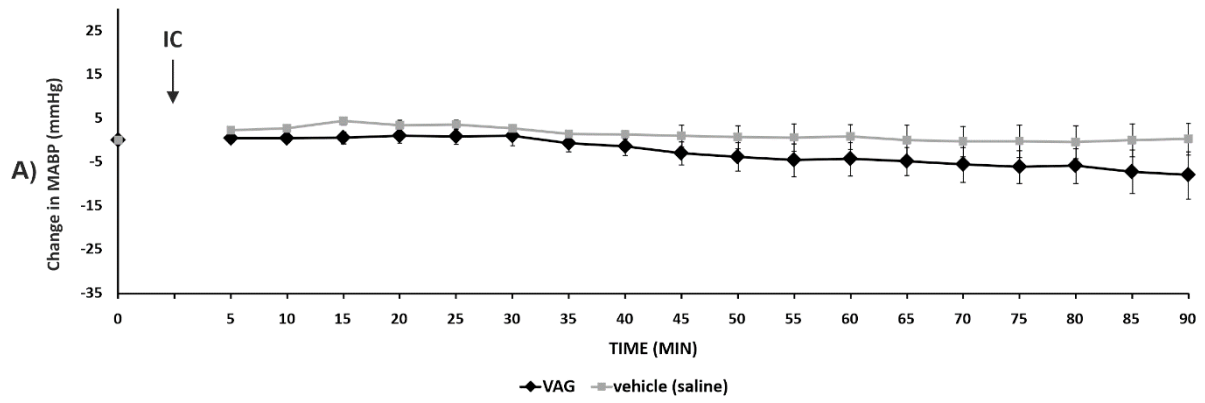

CHANGES IN MEAN HEART RATE IN RATS AFTER ADMINISTRATION INTO THE COLON

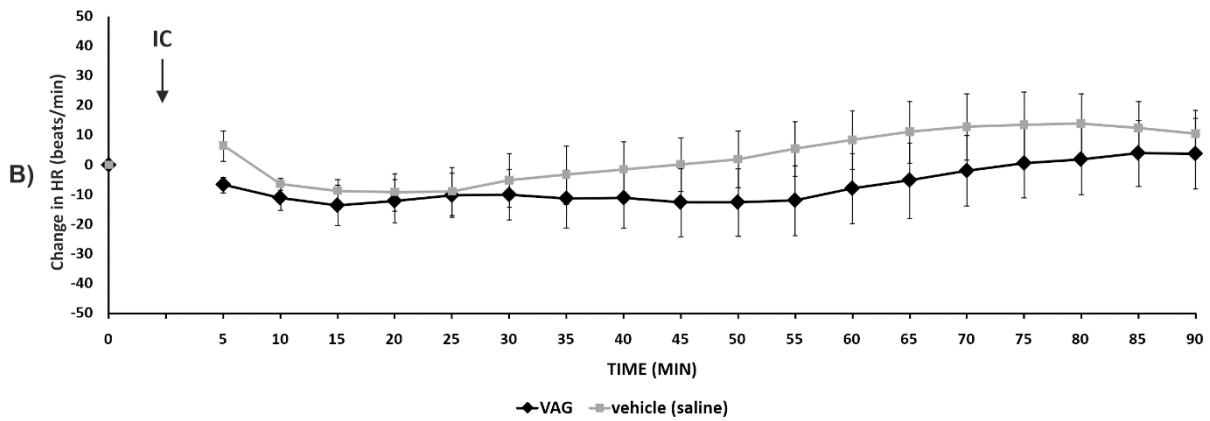

**Figure S10.**

[A] Changes in mean arterial blood pressure ( $\Delta$ MABP, mmHg) and [B] heart rate ( $\Delta$ HR, beats/min) in Wistar rats after the subphrenical vagotomy. Means  $\pm$  SE are presented.

\* - vs Baseline

CHANGES IN MEAN ARTERIAL BLOOD PRESSURE IN RATS AFTER ADMINISTRATION INTO THE COLON

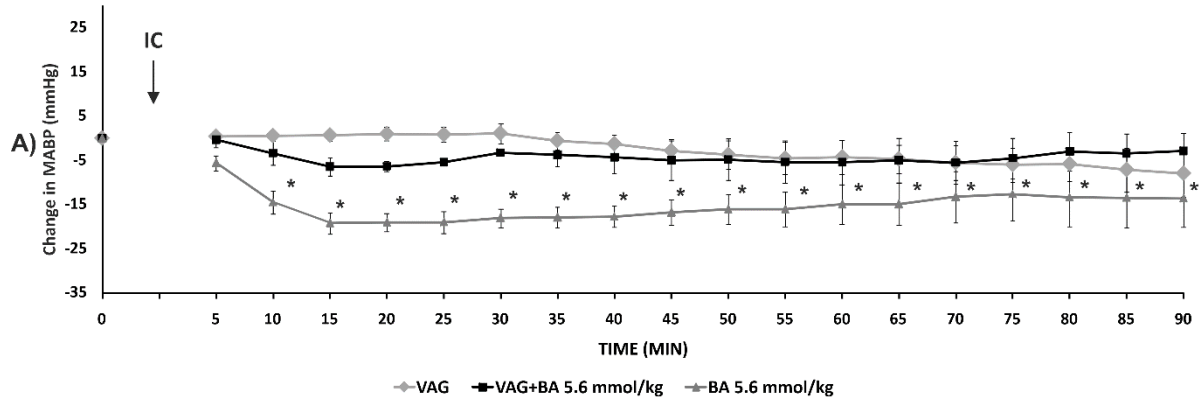

CHANGES IN MHEART RATE IN RATS AFTER ADMINISTRATION INTO THE COLON

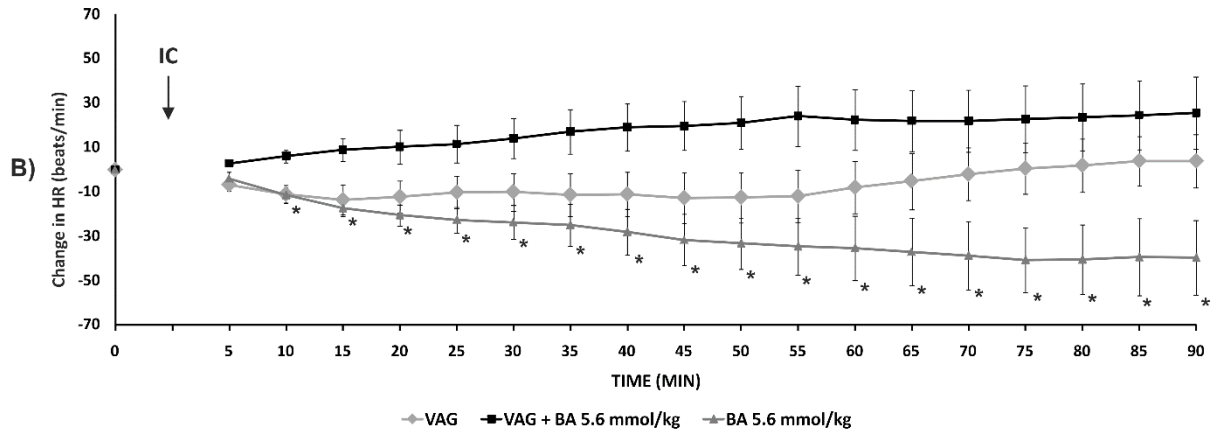

Figure S11.

[A] Changes in mean arterial blood pressure ( $\Delta$ MABP, mmHg) and [B] heart rate ( $\Delta$ HR, beats/min) in Wistar rats after administration into the colon (IC) of BA at a dose of 5.6 mmol/kg b.w. after the subphrenical vagotomy. Means  $\pm$  SE are presented.

\* - vs Baseline

CHANGES IN MEAN ARTERIAL BLOOD PRESSURE IN RATS AFTER ADMINISTRATION INTO THE COLON

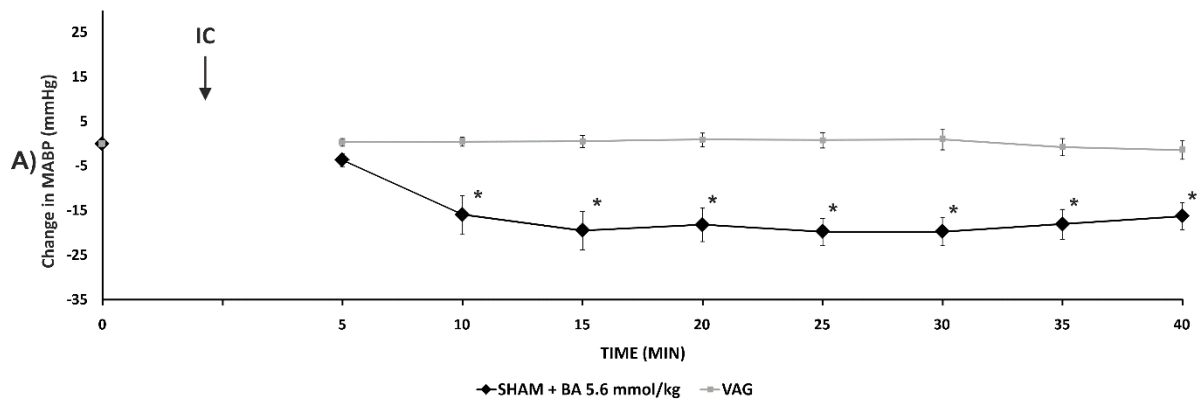

CHANGES IN MEAN HEART RATE IN RATS AFTER ADMINISTRATION INTO THE COLON

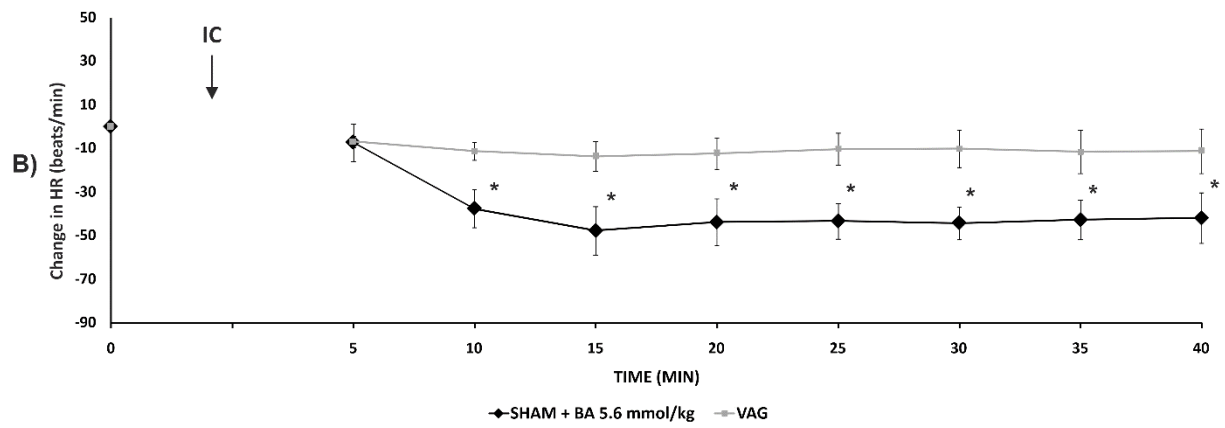

**Figure S12.**

[A] Changes in mean arterial blood pressure ( $\Delta$ MABP, mmHg) and [B] heart rate ( $\Delta$ HR, beats/min) in Wistar rats after administration into the colon (IC) of BA at a dose of 5.6 mmol/kg b.w after shame surgery. Means  $\pm$  SE are presented.

\* - vs Baseline

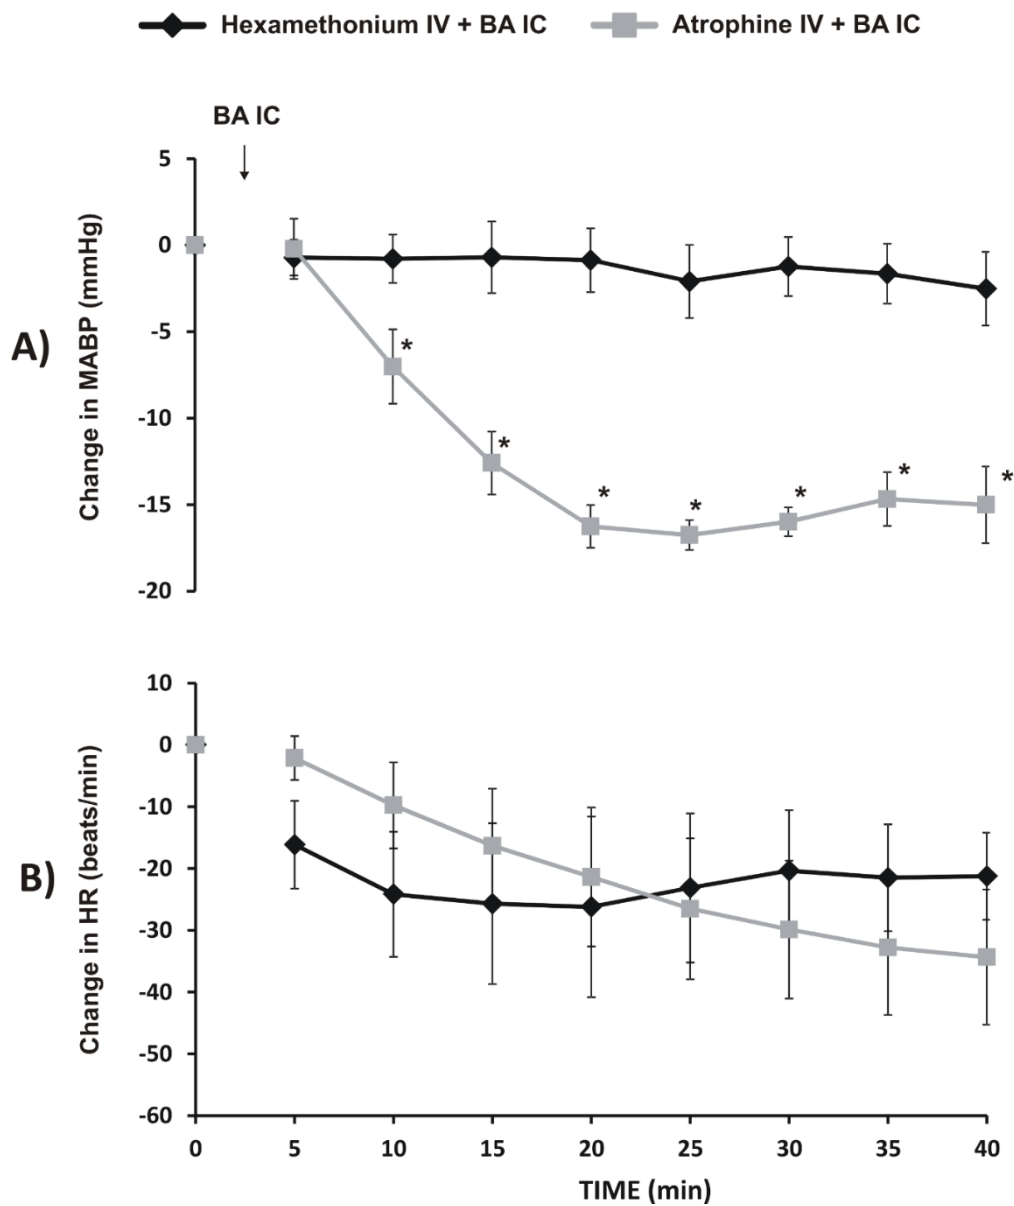

**Figure S13.**

Changes in mean arterial blood pressure ( $\Delta$ MABP, mmHg) and heart rate ( $\Delta$ HR, beats/min) in Wistar rats after the intracolonic administration of BA (BA IC) at a dose of 5.6 mmol/kg in rats pretreated with [A] hexamethonium (hexamethonium IV + BA IC) or [B] atropine (atropine IV + BA IC). Means  $\pm$  SE are presented

\*-p<0.05 - vs baseline.

CHANGES IN MEAN ARTERIAL BLOOD PRESSURE IN RATS AFTER ADMINISTRATION INTO THE COLON

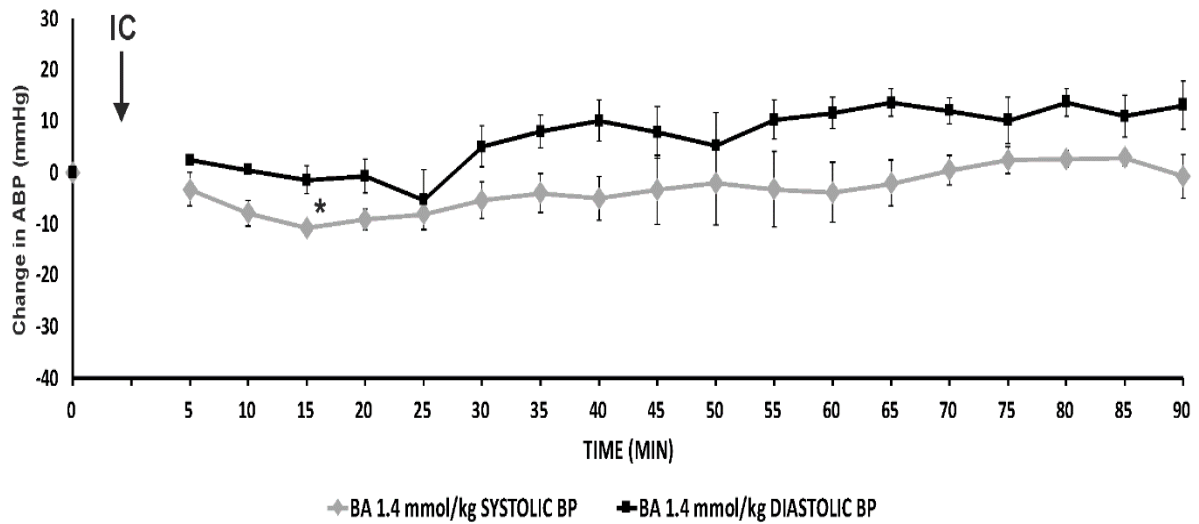

**Figure S14.**

Changes in arterial blood pressure ( $\Delta$ ABP, mmHg) in Wistar rats after the intracolonic administration (IV) of BA at a dose of 1.4 mmol/kg. Means  $\pm$  SE are presented.

\* - vs Baseline

CHANGES IN MEAN ARTERIAL BLOOD PRESSURE IN RATS AFTER ADMINISTRATION INTO THE COLON

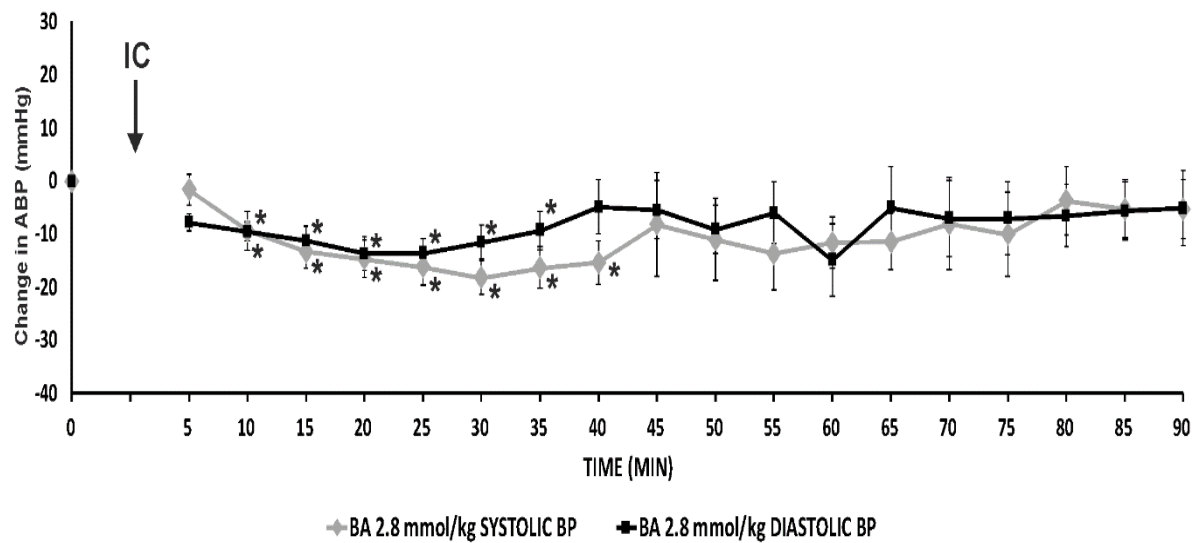

**Figure S15.**

Changes in arterial blood pressure ( $\Delta$ ABP, mmHg) in Wistar rats after the intracolonic administration (IV) of BA at a dose of 2.8 mmol/kg. Means  $\pm$  SE are presented.

\* - vs Baseline

CHANGES IN MEAN ARTERIAL BLOOD PRESSURE IN RATS AFTER ADMINISTRATION INTO THE COLON

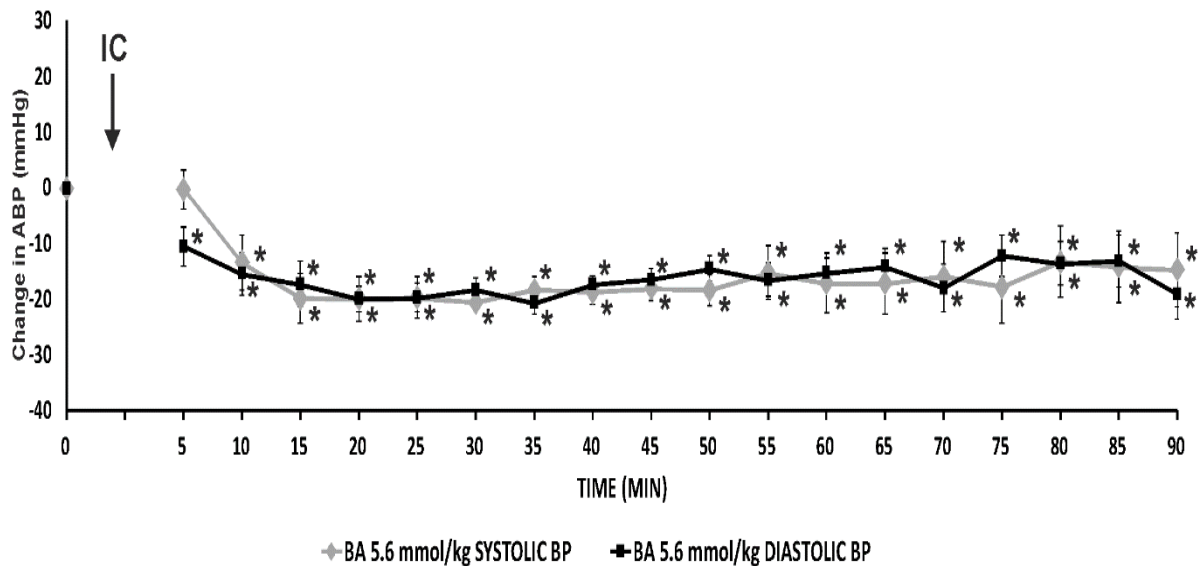

**Figure S16.**

Changes in arterial blood pressure ( $\Delta$ ABP, mmHg) in Wistar rats after the intracolonic administration (IV) of BA at a dose of 5.6 mmol/kg. Means  $\pm$  SE are presented.

\* - vs Baseline
